# Supplementary material
Source: HighWire-hosted journal article supplement (https://cmaj.ca/highwire/filestream/149498/field_highwire_adjunct_files/1/221318-res-2-at.pdf)
Supplement: 221318-res-2-at.pdf [file 221318-res-2-at.pdf]

**eTable 2.** Monthly observed and expected rates per 100,000 and adjusted relative change (RR, 95% CI) in eating disorder-related emergency department visits and hospitalizations in Ontario during the pandemic era among adolescents and young adults age 10 to 26, by age.

|                | 10-17                       |               |                   |                  |               |                   | 18-26                       |               |                   |                  |               |                   |
|----------------|-----------------------------|---------------|-------------------|------------------|---------------|-------------------|-----------------------------|---------------|-------------------|------------------|---------------|-------------------|
|                | Emergency department visits |               |                   | Hospitalizations |               |                   | Emergency department visits |               |                   | Hospitalizations |               |                   |
|                | Observed rate               | Expected rate | RR (95% CI)       | Observed rate    | Expected rate | RR (95% CI)       | Observed rate               | Expected rate | RR (95% CI)       | Observed rate    | Expected rate | RR (95% CI)       |
| Overall        | 7.38                        | 3.33          | 2.21 (2.17, 2.26) | 8.82             | 5.74          | 1.54 (1.54, 1.54) | 2.79                        | 2.46          | 1.13 (1.10, 1.16) | 2.21             | 2.38          | 0.93 (0.91, 0.95) |
| March 2020     | 2.94                        | 3.25          | 0.90 (0.89, 0.91) | 5.1              | 5.43          | 0.94 (0.94, 0.94) | 1.55                        | 2.46          | 0.63 (0.62, 0.64) | 1.86             | 2.3           | 0.81 (0.80, 0.82) |
| April 2020     | 3.09                        | 3.25          | 0.95 (0.94, 0.96) | 5.1              | 5.45          | 0.94 (0.94, 0.94) | 1.49                        | 2.46          | 0.61 (0.60, 0.61) | 1.12             | 2.3           | 0.49 (0.48, 0.49) |
| May 2020       | 2.78                        | 3.26          | 0.85 (0.84, 0.86) | 5.02             | 5.47          | 0.92 (0.92, 0.92) | 2.48                        | 2.46          | 1.01 (0.99, 1.02) | 2.11             | 2.31          | 0.91 (0.90, 0.92) |
| June 2020      | 4.87                        | 3.26          | 1.49 (1.47, 1.51) | 6.26             | 5.49          | 1.14 (1.14, 1.14) | 2.11                        | 2.46          | 0.86 (0.84, 0.87) | 2.48             | 2.31          | 1.07 (1.06, 1.09) |
| July 2020      | 6.34                        | 3.27          | 1.94 (1.91, 1.96) | 8.58             | 5.5           | 1.56 (1.56, 1.56) | 2.36                        | 2.46          | 0.96 (0.94, 0.97) | 2.55             | 2.32          | 1.10 (1.08, 1.11) |
| August 2020    | 5.02                        | 3.28          | 1.53 (1.51, 1.55) | 7.34             | 5.52          | 1.33 (1.33, 1.33) | 3.1                         | 2.46          | 1.26 (1.24, 1.28) | 2.42             | 2.32          | 1.04 (1.03, 1.06) |
| September 2020 | 5.56                        | 3.28          | 1.70 (1.67, 1.72) | 8.27             | 5.54          | 1.49 (1.49, 1.49) | 2.98                        | 2.46          | 1.21 (1.19, 1.23) | 2.11             | 2.33          | 0.91 (0.89, 0.92) |
| October 2020   | 7.81                        | 3.29          | 2.38 (2.34, 2.41) | 10.2             | 5.56          | 1.83 (1.83, 1.84) | 2.79                        | 2.46          | 1.13 (1.11, 1.16) | 2.05             | 2.34          | 0.88 (0.87, 0.89) |
| November 2020  | 6.49                        | 3.29          | 1.97 (1.94, 2.00) | 9.58             | 5.58          | 1.72 (1.72, 1.72) | 3.66                        | 2.46          | 1.49 (1.46, 1.52) | 2.79             | 2.34          | 1.19 (1.18, 1.21) |
| December 2020  | 7.19                        | 3.3           | 2.18 (2.15, 2.22) | 8.96             | 5.6           | 1.60 (1.60, 1.60) | 2.79                        | 2.46          | 1.13 (1.11, 1.16) | 2.05             | 2.35          | 0.87 (0.86, 0.89) |
| January 2021   | 7.69                        | 3.3           | 2.33 (2.29, 2.37) | 10.43            | 5.62          | 1.86 (1.86, 1.86) | 2.35                        | 2.46          | 0.95 (0.93, 0.97) | 2.35             | 2.35          | 1.00 (0.98, 1.01) |
| February 2021  | 8.45                        | 3.31          | 2.56 (2.51, 2.60) | 9.97             | 5.63          | 1.77 (1.77, 1.77) | 2.9                         | 2.46          | 1.18 (1.15, 1.21) | 2.35             | 2.35          | 1.00 (0.98, 1.01) |
| March 2021     | 10.27                       | 3.31          | 3.10 (3.05, 3.16) | 11.26            | 5.65          | 1.99 (1.99, 1.99) | 3.39                        | 2.46          | 1.38 (1.35, 1.41) | 2.78             | 2.36          | 1.18 (1.16, 1.20) |
| April 2021     | 9.89                        | 3.32          | 2.98 (2.93, 3.04) | 12.03            | 5.67          | 2.12 (2.12, 2.12) | 3.83                        | 2.46          | 1.55 (1.52, 1.59) | 2.41             | 2.36          | 1.02 (1.00, 1.04) |
| May 2021       | 10.35                       | 3.32          | 3.12 (3.06, 3.18) | 11.64            | 5.69          | 2.05 (2.05, 2.05) | 2.84                        | 2.46          | 1.15 (1.13, 1.18) | 2.47             | 2.37          | 1.04 (1.02, 1.06) |
| June 2021      | 9.51                        | 3.33          | 2.86 (2.81, 2.92) | 11.34            | 5.71          | 1.99 (1.99, 1.99) | 3.09                        | 2.46          | 1.25 (1.22, 1.29) | 2.41             | 2.38          | 1.01 (1.00, 1.03) |
| July 2021      | 6.93                        | 3.33          | 2.08 (2.04, 2.12) | 8.22             | 5.73          | 1.43 (1.43, 1.43) | 3.02                        | 2.46          | 1.23 (1.20, 1.26) | 2.22             | 2.38          | 0.93 (0.92, 0.95) |
| August 2021    | 7.99                        | 3.34          | 2.39 (2.35, 2.44) | 8.83             | 5.75          | 1.54 (1.54, 1.54) | 3.15                        | 2.46          | 1.28 (1.24, 1.31) | 2.65             | 2.39          | 1.11 (1.09, 1.13) |
| September 2021 | 8.68                        | 3.34          | 2.60 (2.54, 2.65) | 9.51             | 5.77          | 1.65 (1.65, 1.65) | 2.78                        | 2.46          | 1.13 (1.10, 1.16) | 1.91             | 2.39          | 0.80 (0.78, 0.82) |

|               |       |      |                   |       |      |                   |      |      |                   |      |      |                   |
|---------------|-------|------|-------------------|-------|------|-------------------|------|------|-------------------|------|------|-------------------|
| October 2021  | 11.34 | 3.35 | 3.39 (3.32, 3.46) | 12.03 | 5.79 | 2.08 (2.08, 2.08) | 3.58 | 2.46 | 1.45 (1.41, 1.49) | 3.02 | 2.4  | 1.26 (1.24, 1.29) |
| November 2021 | 12.79 | 3.35 | 3.81 (3.73, 3.90) | 11.26 | 5.81 | 1.94 (1.94, 1.94) | 3.95 | 2.46 | 1.60 (1.56, 1.65) | 2.59 | 2.4  | 1.08 (1.06, 1.10) |
| December 2021 | 8.14  | 3.36 | 2.43 (2.37, 2.48) | 7.46  | 5.83 | 1.28 (1.28, 1.28) | 2.35 | 2.46 | 0.95 (0.92, 0.98) | 2.16 | 2.41 | 0.90 (0.88, 0.92) |
| January 2022  | 8.45  | 3.36 | 2.51 (2.45, 2.57) | 9.43  | 5.85 | 1.61 (1.61, 1.61) | 2.76 | 2.46 | 1.12 (1.09, 1.15) | 1.47 | 2.41 | 0.61 (0.60, 0.62) |
| February 2022 | 9.51  | 3.37 | 2.82 (2.76, 2.89) | 9.13  | 5.87 | 1.56 (1.56, 1.56) | 2.69 | 2.46 | 1.09 (1.06, 1.13) | 2.39 | 2.42 | 0.99 (0.97, 1.01) |
| March 2022    | 8.15  | 3.37 | 2.42 (2.36, 2.47) | 7.85  | 5.89 | 1.33 (1.33, 1.33) | 2.69 | 2.46 | 1.09 (1.06, 1.13) | 2.39 | 2.42 | 0.99 (0.96, 1.01) |
| April 2022    | 6.64  | 3.38 | 1.96 (1.92, 2.01) | 9.81  | 5.91 | 1.66 (1.66, 1.66) | 2.63 | 2.46 | 1.07 (1.04, 1.10) | 2.08 | 2.43 | 0.86 (0.84, 0.88) |
| May 2022      | 8.98  | 3.38 | 2.65 (2.59, 2.72) | 8.00  | 5.93 | 1.35 (1.35, 1.35) | 2.76 | 2.46 | 1.12 (1.08, 1.16) | 1.59 | 2.43 | 0.65 (0.64, 0.67) |
| June 2022     | 5.96  | 3.39 | 1.76 (1.71, 1.80) | 8.53  | 5.95 | 1.43 (1.43, 1.43) | 3.06 | 2.46 | 1.24 (1.20, 1.29) | 2.02 | 2.44 | 0.83 (0.81, 0.85) |
| July 2022     | 4.53  | 3.4  | 1.33 (1.30, 1.37) | 6.04  | 5.97 | 1.01 (1.01, 1.01) | 2.02 | 2.46 | 0.82 (0.79, 0.85) | 1.96 | 2.44 | 0.80 (0.78, 0.82) |
| August 2022   | 4.75  | 3.4  | 1.40 (1.36, 1.44) | 7.17  | 5.99 | 1.20 (1.20, 1.20) | 2.45 | 2.46 | 0.99 (0.96, 1.03) | 1.59 | 2.45 | 0.65 (0.63, 0.67) |

Abbreviations: RR = relative rate; CI = confidence interval
